# Supplementary material for: Plasmid Characterization and Chromosome Analysis of Two netF+ Clostridium perfringens Isolates Associated with Foal and Canine Necrotizing Enteritis
Source: PLoS One. 2016 Feb 9;11(2):e0148344. doi: 10.1371/journal.pone.0148344 (PMC4747519; doi:10.1371/journal.pone.0148344)
Supplement: S2 Table — (XLSX) [file pone.0148344.s002.xlsx]

## Sheet: S2 Table
S2 Table. Summary of predicted genes identified by MyRast software in pJFP838D.
Gene	Locus Tag	Size (aa)	Automated Annotation	Protein Blast	Length	E-value	Identity	Gaps	Superfamily/Domain
16..816	JFP838_pD0001	266	tyrosine site-specific recombinase	tyrosine recombinase [Clostridium perfringens]	266	0	262/266(98%)	0/266(0%)	DNA_BRE_C superfamily
1192..1503	JFP838_pD0002	103	hypothetical protein	hypothetical protein [Clostridium perfringens]	103	4e-62	103/103(100%)	0/103(0%)
1504..1788	JFP838_pD0003	94	hypothetical protein	hypothetical protein [Clostridium perfringens]	94	3e-56	94/94(100%)	0/94(0%)
1814..2578	JFP838_pD0004	254	DNA adenine-specific methyltransferase	DNA adenine-specific methyltransferase [Clostridium perfringens C str. JGS1495]	254	0	253/254(99%)	0/254(0%)	AdoMet_Mtases superfamil
2642..2860	JFP838_pD0005	72	hypothetical protein	hypothetical protein [Clostridium perfringens]	72	2e-38	72/72(100%)	0/72(0%)	DUF 4236 superfamily
2864..3166	JFP838_pD0006	100	hypothetical protein	hypothetical protein [Clostridium perfringens]	100	2e-63	100/100(100%)	0/100(0%)
3177..3821	JFP838_pD0007	214	sortase	sortase surface protein transpeptidase [Clostridium perfringens]	214	2e-147	213/214(99%)	0/214(0%)	Sortase family
3831..4088	JFP838_pD0008	85	hypothetical protein	hypothetical protein [Clostridium perfringens]	85	9e-50	84/85(99%)	0/85(0%)
4104..4232	JFP838_pD0009	42	hypothetical protein	hypothetical protein [Clostridium perfringens]	42	8e-20	42/42(100%)	0/42(0%)
4303..7866	JFP838_pD0010	1187	adhesin	collagen adhesin-like protein [Clostridium perfringens]	1187	0	1161/1187(98%)	0/1187(0%)	can_peptidase
8006..8380	JFP838_pD0011	124	growth inhibitor PemK	growth inhibitor PemK [Clostridium perfringens]	124	3e-82	124/124(100%)	0/124(0%)	PemK superfamily
8448..9551	JFP838_pD0012	367	hypothetical protein	hypothetical protein [Clostridium perfringens]	367	0	365/367(99%)	0/367(0%)	SCP superfamily
9613..9987	JFP838_pD0013	124	hypothetical protein	hypothetical protein [Clostridium perfringens]	124	1e-83	124/124(100%)	0/124(0%)
10083..10289	JFP838_pD0014	68	DNA-binding transcriptional regulator	transcriptional regulator [Clostridium perfringens]	77	1e-39	68/68(100%)	0/68(0%)	HTH_XRE superfamily
10439..10843	JFP838_pD0015	134	transcriptional regulator	XRE family transcriptional regulator [Clostridium perfringens]	134	1e-82	134/134(100%)	0/134(0%)	HTH_XRE superfamily
11087..11899	JFP838_pD0016	270	plasmid replication protein	Plasmid replication protein [Clostridium perfringens]	270	0	269/270(99%)	0/270(0%)
12434..13360	JFP838_pD0017	308	plasmid segregation protein ParM	peptide transporter [Clostridium perfringens]	308	0	308/308(100%)	0/308(0%)	NBD_Sugar_Kinase_HSP70_actin superfamily
13339..13602	JFP838_pD0018	87	hypothetical protein	hypothetical protein [Clostridium perfringens]	87	4e-51	87/87(100%)	0/87(0%)
13659..14156	JFP838_pD0019	165	hypothetical protein	hypothetical protein [Clostridium perfringens]	165	6e-105	163/165(99%)	0/165(0%)	Hemagglutinin
14222..14449	JFP838_pD0020	75	hypothetical protein	hypothetical protein [Clostridium perfringens]	75	2e-42	75/75(100%)	0/75(0%)
14735..15265	JFP838_pD0021	176	SOS-response repressor and protease LexA	LexA repressor [Clostridium perfringens SM101]	176	4e-118	175/176(99%)	0/176(0%)	HTH superfamily
15332..15802	JFP838_pD0022	156	hypothetical protein	hypothetical protein [Clostridium perfringens]	156	3e-105	156/156(100%)	0/156(0%)
16025..16348	JFP838_pD0023	107	transcriptional regulator, PadR family	PadR family transcriptional regulator [Clostridium perfringens]	107	4e-64	107/107(100%)	0/107(0%)	HTH superfamily
16352..16993	JFP838_pD0024	213	hypothetical protein	hypothetical protein [Clostridium perfringens]	213	3e-141	213/213(100%)	0/213(0%)
17004..17744	JFP838_pD0025	246	beta2 toxin	beta-2 toxin [Clostridium perfringens]	265	5e-178	242/246(98%)	0/246(0%)
17953..18072	JFP838_pD0026	39	hypothetical protein	hypothetical protein CPC_A0171 [Clostridium perfringens C str. JGS1495]	39	5e-16	39/39(100%)	0/39(0%)
18056..18184	JFP838_pD0027	42	signal peptidase I	signal peptidase I [Clostridium perfringens]	42	2e-17	38/42(90%)	0/42(0%)	Peptidase_S24_S26 superfamily
18330..19064	JFP838_pD0028	244	resolvase	resolvase [Clostridium perfringens]	244	1e-172	242/244(99%)	0/244(0%)	Ser_recombinase superfamily
19265..19720	JFP838_pD0029	151	hypothetical protein	hypothetical protein [Desulfotomaculum reducens]	155	7e-35	68/150(45%)	4/150(2%)
19723..20373	JFP838_pD0030	216	hypothetical protein	hypothetical protein [Spirochaeta smaragdinae]	217	5e-72	112/217(52%)	2/217(0%)	Tryp_Scp superfamily
20529..21350	JFP838_pD0031	273	hypothetical protein	hypothetical protein [Clostridium perfringens]	273	0	270/273(99%)	0/273(0%)	HNHc superfamily
21337..22986	JFP838_pD0032	549	hypothetical protein	hypothetical protein [Clostridium perfringens]	549	0	540/549(98%)	0/549(0%)	P-loop_NTPase superfamily
23384..24241	JFP838_pD0033	285	transposase	transposase [Clostridium perfringens]	293	0	278/293(95%)	8/293(2%)	PDDEXK_2 superfamily
24305..24712	JFP838_pD0034	135	hypothetical protein	hypothetical protein [Clostridium perfringens]	135	6e-91	135/135(100%)	0/135(0%)
24841..25743	JFP838_pD0035	300	hypothetical protein	hypothetical protein [Clostridium perfringens]	300	0	300/300(100%)	0/300(0%)	HTH_Hin-like superfamily
25768..26001	JFP838_pD0036	77	hypothetical protein	hypothetical protein [Clostridium perfringens]	77	2e-44	77/77(100%)	0/77(0%)
26313..26624	JFP838_pD0037	103	hypothetical protein	hypothetical protein [Clostridium perfringens]	103	2e-64	103/103(100%)	0/103(0%)
26770..26940	JFP838_pD0038	56	hypothetical protein	hypothetical protein [Clostridium perfringens]	133	9e-30	53/56(95%)	0/56(0%)
27008..27124	JFP838_pD0039	38	hypothetical protein	hypothetical protein [Clostridium perfringens]	117	7e-16	35/36(97%)	0/36(0%)
27658..29064	JFP838_pD0040	468	putative amidoligase	swim zinc finger domain protein; amidoligase [Clostridium perfringens]	468	0	457/468(98%)	0/468(0%)	Amidoligase_2 superfamily
29165..29494	JFP838_pD0041	109	hypothetical protein	hypothetical protein, partial [Clostridium perfringens]	173	1e-65	104/109(95%)	0/109(0%)	DUF4417
29721..31142	JFP838_pD0042	473	transposase	transposase [Clostridium perfringens]	478	0	472/473(99%)	0/473(0%)	DDE_Tnp-1
31459..32418	JFP838_pD0043	319	enterotoxin	Clostridium Perfringens Enterotoxin	319	0	319/319(100%)	0/319(0%)	Clenterotox superfamily
32778..32993	JFP838_pD0044	71	holin	holin [Clostridium perfringens]	71	9e-47	71/71(100%)	0/71(0%)	Phage_holin_1 superfamily
33670..34125	JFP838_pD0045	151	transposase	transposase [Clostridium perfringens]	151	2e-108	151/151(100%)	0/151(0%)	Y1_Tnp superfamily
34586..34795	JFP838_pD0046	69	hypothetical protein	hypothetical protein [Clostridium perfringens]	126	7e-26	50/66(76%)	1/66(1%)
35083..35256	JFP838_pD0047	57	hypothetical protein	hypothetical protein [Clostridium perfringens]	57	3e-28	57/57(100%)	0/57(0%)
35335..36279	JFP838_pD0048	314	cytosine methyltransferase	DNA methyltransferase [Clostridium perfringens]	339	0	314/314(100%)	0/314(0%)	AdoMet_Mtases superfamil
36294..36599	JFP838_pD0049	101	hypothetical protein	hypothetical protein [Clostridium perfringens]	101	7e-63	101/101(100%)	0/101(0%)
37518..38282	JFP838_pD0050	254	TcpJ	TcpJ [Clostridium perfringens]	254	2e-175	249/254(98%)	0/254(0%)
38291..38785	JFP838_pD0051	164	TcpI	TcpI [Clostridium perfringens]	164	3e-105	158/164(96%)	0/164(0%)	DUF 457
38788..41280	JFP838_pD0052	830	TcpH	TcpH [Clostridium perfringens]	833	0	799/833(96%)	3/833(0%)	TrbL superfamily
41382..42386	JFP838_pD0053	334	cell wall-binding protein TcpG	TcpG, probable cell wall-binding protein	334	0	292/295(99%)	0/295(0%)	Lysozyme-like superfamily; NLPC_P60 superfamily
42386..44908	JFP838_pD0054	840	TcpF	TcpF [Clostridium perfringens]	840	0	834/840(99%)	0/840(0%)	P-loop_NTPase superfamily
44967..45335	JFP838_pD0055	122	TcpE	TcpE [Clostridium perfringens]	122	3e-79	120/122(98%)	0/122(0%)	TcpE superfamily
45348..45695	JFP838_pD0056	115	TcpD	TcpD [Clostridium perfringens]	115	4e-66	105/115(91%)	0/115(0%)
45707..46783	JFP838_pD0057	358	TcpC	TcpC [Clostridium perfringens]	358	0	358/358(100%)	0/358(0%)	TcpC superfamily
46776..46940	JFP838_pD0058	54	hypothetical protein	hypothetical protein [Clostridium perfringens]	57	6e-27	50/54(93%)	0/54(0%)
46960..48558	JFP838_pD0059	532	TcpA	TcpA [Clostridium perfringens]	527	0	295/523(56%)	5/523(0%)	P-loop_NTPase superfamily
